# Supplementary material for: Identification and Characterization of Biomarkers and Their Role in Opioid Addiction by Integrated Bioinformatics Analysis
Source: Front Neurosci. 2020 Nov 27;14:608349. doi: 10.3389/fnins.2020.608349 (PMC7729193; doi:10.3389/fnins.2020.608349)
Supplement: Supplementary Table 5 — Results of the 269 differentially expressed genes, and marked the key genes in the file with red font. [file Table_5.XLSX]

## Sheet: pheatmap_reorder
id	GSM2341348	GSM2341360	GSM2341347	GSM2341359	GSM2341367	GSM2341382	GSM2341344	GSM2341355	GSM2341361	GSM2341379	GSM2341380	GSM2341370	GSM2341362	GSM2341371	GSM2341365	GSM2341363	GSM2341369	GSM2341358	GSM2341368	GSM2341374	GSM2341364	GSM2341373	GSM2341378	GSM2341366	GSM2341376
UBE2H	41.4	153.3	203.75	105.35	144.15	173.45	142.25	116.75	63.8	317.65	161.2	198.55	159.6	169.7	264.3	302.85	285.45	210.7	76.6	175.7	221.85	198.5	187.05	155.75	174.9
SRD5A1	93.0667	66.3	125.433	78.3	144.133	141.733	180.3	202.567	78	277.933	200.367	183.033	112.2	192.9	222.367	177.067	197.633	167.033	202.233	137.6	172.6	190.8	215.167	125.5	158.267
TRA2B	323.867	482.767	562.7	452.467	396	406.2	478.667	469.167	397.167	616.633	492.3	533.533	547.1	470.1	533.467	416.367	448.8	482.733	463.2	491.167	456.8	393.7	509.233	282.2	348.533
RAB40B	990.8	1179.75	1311.25	751	1016.05	1340.4	1172.2	1276.15	345.2	1372	1196.95	1240.5	1138.45	960.15	1448.65	1040.45	951.2	1113.75	1253.9	1359.8	1484.45	1256.6	1271.35	969.6	986.75
PHKA1	7.5	15.6	40.6	74.4	50.2	101.6	38.5	4.2	28.3	15.3	49	71.9	64.7	63.8	33.7	72.6	119.4	50.6	40.4	77.7	101.3	33.7	59.5	24.8	83
YWHAZ	766.52	436.9	1474.28	1074.98	1188.82	1537.32	1364.78	1328.4	869.14	1125.84	1083.76	3001.68	3286.9	2288.8	1980.66	1908.08	2069.54	1587.1	1577.7	1527.36	2013.92	2152.54	2039.64	1820.96	1420.18
ASTN1	227.8	144.4	536.9	355.5	418.5	522.4	523.3	371.9	298.9	614	672.9	1070.5	797.8	982	978.5	1148.4	762.9	813.3	764	752.7	1250.7	1019.7	917.6	815.3	868
INPP4A	136.975	78.875	192.4	139.425	109.875	200.575	215.225	205.375	105.225	197.275	190.8	287.275	296.45	330.85	328.6	269.925	272.35	243.125	211.075	252.5	275.75	336.925	204.675	219.825	363.85
ICMT	187.4	163.467	222.5	255.367	180	255.433	197.567	284.267	169.567	177.133	263.133	226.233	293.333	256.767	292.4	276	294.3	260.5	227.867	218.1	255.5	222	274.867	242.933	223.167
NPAS2	161.18	81.32	165.2	169.18	172.52	167.76	185.6	178.24	155.32	181.46	202.86	176.54	238.78	224.08	356.3	286.52	287.54	207.28	232.78	216.6	303.06	225.58	256.08	174.9	212.42
GLS	296.48	215.66	408.66	381.86	405.18	527.88	475.12	495.06	244.78	497.34	504.96	545.42	587.16	473.38	613.66	546.32	568.08	609.14	563.06	551.48	608	539.2	488.92	262.58	442.78
DGKB	115.1	22.7	233	242.6	129.4	223.6	221.3	171.1	244.1	219	345	438.4	470.5	499.8	629.7	319.1	689.8	342	268.5	259.3	348.3	399.7	309.9	338.8	126.1
KCNAB1	312.375	123.25	896.125	559.45	479.85	729.075	600.5	785.4	218.4	722.45	978.175	960.375	993.5	972.775	1303.47	715.5	1609.17	824.05	862.35	927.1	737.4	1223.35	952.625	766.575	549.575
ATP2B1	861.3	162.233	1894.27	1101.47	989.767	1532.77	1684.5	1886.63	699.033	1946.03	2276.33	2460.1	2445.03	3407.67	2244.1	1683.77	3672.83	1260.33	1382.3	1288.03	1364.57	1663.93	1439.4	1293.63	1424.9
GPR88	641.7	128.2	2692.2	1365.6	1813.5	1975.3	1683.9	2304.3	1490.5	4288.4	3366	3381.4	2792	3075.1	4779.9	1644.3	6451.5	2503.9	2458.6	2533.9	2156.4	2070.8	2232.6	2860.8	1709.2
PDE10A	127.6	124	635.367	165.5	235.333	323.3	235.767	412.5	215.067	549.3	590.7	745.1	711	767.267	982.433	331.667	1209.6	537.4	362.667	465.667	439.433	550.133	460.233	754.5	267.867
PRKAR1A	519.333	898.167	1304.77	751.433	796.833	1041.7	1098.97	981.6	713.333	1409.8	1573.8	1996.97	1254.77	1421.33	1547.93	1378.7	1445.3	1052	1244.53	1182.47	1504.57	1300.17	1136.37	973.4	1015.07
EID1	220.367	280.867	553.333	220.7	249.767	273.9	432.633	342.367	209	659.3	538.933	774.6	657.067	622.733	378.567	565	506	398.133	404.4	386.8	541.167	476.6	481.3	343.8	444.9
SCN3A	203.4	26.5	998.9	280.5	365.6	672.3	482.5	402.7	575.6	1279.8	1039.3	1804.8	1469.5	1210.6	863.3	1110.4	963.4	656.4	726.4	854.9	952	923.1	675.8	908.8	554.8
BLZF1	9.6	14.0333	15.4	6.16667	19.2	26.4667	22.9333	18.2	16.7333	24.1333	35.1	45.5	25.5667	26	23.1	29	31.4667	16.4333	14.2667	16.3	31.5333	18.8	18.8667	25.9333	13.7333
AKAP11	298.2	280.25	1091.25	528.4	398.4	817.8	714.3	752.7	844.55	1264.95	1536.25	2459.4	1699.9	1554.4	1948.8	1482.1	1585.25	1678.4	880.45	1170.75	1447.7	1263.75	1074.1	1728.3	964.8
TPD52	168.975	233.25	272.275	160.675	196.1	263.9	217.225	199.175	219.25	304.475	344.55	468.65	374.9	369.575	422.325	357.225	402.575	321.2	226.15	281.125	318.5	314.725	270.775	238.4	142
PPP3CA	5167.67	779.433	6221.43	4611.97	4110.03	5319.03	4806	5044.63	4422.9	5447.63	7074.73	7603.63	6497.7	5387.3	4294.63	4665.93	6734.63	3977.03	5605.13	4657.83	4346.33	4756.83	3832.8	5477	5508.27
PEG3	3086.4	1430.85	4128.3	3523	3311.15	3910.6	3980.15	3148.2	2918.65	4199.95	4805.05	8029.8	5263.85	4210.5	3170.75	4467.4	4175.85	2897.8	4074.7	3731.15	4073.75	3756.9	2675.15	4673.8	3546.9
DHX57	57.2	20.2	75.4	36.8	58.2	23.3	79.1	36.4	52.2	96.9	113.9	100.1	91.1	99.1	84.5	102.9	67.4	20.6	100	104.1	124	69.9	78.1	99.9	110.8
ZWILCH	12	6.1	37.2	16	7	8.2	2.9	17.8	20.1	33.2	62	80	13.6	67.5	79.5	57.9	51.2	3.9	52.4	24.9	49.1	5	55.6	57	55.6
SLC25A15	25.7	22.3	20	17.4	124.8	64	68.3	64.3	127.7	103.3	81.6	44	125.2	135.6	50	36.4	28.5	105.2	91.7	107.9	85	100.4	107.3	138.3	157.4
KBTBD4	16.9	27.5	27.7	15.3	34.2	84.3	19.9	12.1	54.9	52.4	11.8	111.5	71.9	96.9	21.8	28.6	10.7	11	27.1	42.1	53.7	23.1	38.4	89.5	97.4
BTN3A3	11.5	20.95	27.4	5.65	25.5	36.7	25	13.7	39.55	35.65	21.15	52	63.3	52.85	47.75	29.35	15.05	34.9	51.35	40.85	51.75	39.05	21.55	50	33.1
GOLPH3L	19.5	39.6	47.5	75	140.4	247.6	108.6	166.4	184.7	276.9	134.3	277.5	205.9	211.5	128.4	141.3	119.8	155.9	261.7	253.6	191.8	185.5	139.1	329	94.3
TK1	31.3	18.2	94.8	39.9	168.7	145.2	21.2	80	42.3	112.1	127.2	73.5	55.3	98	104.6	69.5	110.4	105.4	63.6	64.7	96.6	110.6	139.9	91.7	136.5
GNB5	252	164.9	452.6	256.6	339.567	288.533	264.733	321.333	127.8	427.8	437.733	266.833	301.7	333.367	395.7	231.3	307.133	228.567	273.3	283.033	253.067	302.167	320.367	247	385.133
RPL35A	827.233	1166.23	1819.37	687.6	875.4	1067.03	903	778.133	959.8	888.833	1139.03	1470	1056.6	949.367	811.9	760.2	827.033	844.367	833.867	950.9	952.133	832.067	1075.4	1519.87	2015.77
WBP11	415.3	148.05	353.6	233.5	291.8	331.35	395.6	360.9	241.7	477.3	414.55	556.7	353.95	427.65	452.55	226.5	263.35	309.65	332.35	339.25	392.95	411	389.15	563.45	402.5
ACOT7	366.35	267.15	662	356.8	542.85	665.85	668.8	703.7	323.2	362.2	359.65	650.55	669.4	678.95	612.6	387.8	373.8	720	595.75	676.95	669.05	770.65	778.7	1406.2	1048.7
PGK1	234.975	332.25	921.3	263.3	356.875	691.75	606.65	503.375	275.425	819.45	702.825	842.3	890.975	859.725	821.05	493.7	746.675	967.2	624.25	767.725	922.8	926.15	1043.62	1185.25	1251.58
NLRP3	8.86667	16.9	9.3	16.4667	20.9667	8.53333	8.5	4.63333	17.1	24.2	7.63333	8.3	14.5	3.23333	10.7333	13.6333	6.9	7.33333	10.8333	7.66667	5.43333	7.46667	6.96667	7.56667	4.5
HPCAL1	358.35	278.55	306.25	355.7	307.2	287.9	291.4	221	348.75	577.1	200.4	280	366.85	258.1	225.25	328.45	199.75	414.55	267.25	262.55	312.8	302.15	339.5	406.55	307.25
SPATA5L1	57.6667	67.3667	69.7	14.8333	72.0667	46.9333	40.4	54.8	52.7333	131.5	102.167	49	43.3667	67.9667	66.7333	56.5333	53.5	68.3	67.3667	67	55.4333	50.8667	80.1667	34.0667	70.2
H2AFV	812.467	786.167	981.267	731	858.067	832.533	877.033	727.267	841.733	1331.2	991.2	949.933	738.867	1112.6	951.7	907.967	1021.13	908.733	780.133	781.3	889	755.567	859.533	625.067	847.467
EIF1AX	407.175	297.675	491.2	283.775	348	327	353.1	349.75	320.15	727.95	597.175	596.8	479.45	531.475	474.925	389.725	527.8	388.05	314.025	310.55	337.95	389.525	306.95	222.525	372.525
FAM149B1	34.9667	36.6333	32.6333	55.9667	28.7667	30.1	35.1	35.9	51.8667	79.3333	69.1667	68.1333	52.9	69.0667	56.8	51.6667	39.5	38.5	40.8667	56.2	38.5667	41.8667	32.9333	52.9	65.6667
HCG4	17	9.9	6.7	8.7	8.3	60.6	9.9	10.6	25.7	111.3	101.9	88.2	29.6	61.8	9.9	8.4	19.5	9.3	12.8	62.6	51.3	54.3	53.8	25.4	69.7
HSD17B6	60.25	81.45	377.5	215.6	184.1	186.75	266.65	188.95	422	524.45	394.6	333.6	335.5	199.65	252	324.3	304.25	214.7	256.3	238.75	270.35	340.85	271.35	275.25	342.05
CEP76	7.3	18.75	53.9	8.65	7.25	22.75	20.25	16.85	20.95	90.55	68.25	31.7	63.45	22.9	29.1	26.25	23.7	37.3	29.8	26.1	50.35	44.2	22.45	46.5	61.05
IGFBP7	92.1333	398.6	643.433	254.833	320	368.3	265.133	286.5	773.333	1764	770.833	513.1	591.3	441.7	210.933	411.333	318.533	420.667	393.467	396.233	578.8	400.033	295.467	805.733	781.933
CDYL	66.0667	59.3667	116.933	66.8333	36.1333	32.6667	55.5667	62.2667	42.0333	176.667	118.5	91.6333	110.433	34.7	83.0333	42.2667	80.0667	84.3667	88.6333	82.2	46.4333	84.3667	69.3667	75.6667	87.9667
MAP2K1	263.4	169.9	1721.4	389.1	600.7	1058.3	892.2	770.9	361.5	3274.3	1098.8	1864.1	2357.5	1529	1286.4	935.5	1099.6	1295.4	1156.3	1121.2	1952.4	1876.7	2148.1	996.1	1837.5
RHEB	195.4	248.8	628.14	320.26	327.06	382.24	397.18	475.02	348.3	1018.92	660.88	498.08	465.18	519.88	506.52	521.86	541.28	605.54	449.64	400.14	497.54	533.84	594.3	458.12	495.38
MAFB	12.9	16	62.3	21.3	82.7	30.2	7.5	43.1	36.9	267.1	70.9	47.3	53.4	74.9	98.7	20.4	58	122.1	44.6	60.2	52.4	88.2	81.3	58.6	101.8
BAZ1A	33.35	51.6	77.7	45.95	47.35	54	47.1	21.25	89.85	66.2	91.8	71.4	56.65	28.55	43.9	89.7	83.7	38	47.25	70.45	50.05	47.65	48.6	36.8	63.6
PCSK5	24.2333	20.0667	41.9333	36.8	45.2	24.4	33.6333	31.1333	66.9	52.6	61.9	31.2667	42.0333	39.6	36.3	56.8	54.4	27.5667	56.8	35.4	41.5	35.4	41.4667	26.8	26.9
MYCN	18.4333	20.9333	34.8667	22.6333	49.8333	39.2333	25.4667	9.26667	69.1	56.7333	61.0333	43.6333	14.9667	36.3667	22.2	41.1333	19.9667	21.8	31.4333	39.1333	39.5667	44.2333	34.7333	44.7	31.7667
FHL1	452.86	355.56	707.22	662.42	829.2	808.14	812.64	609.12	914.88	1012.08	1001.3	1059.54	1015.54	739.56	715.6	1080.54	648.9	736.98	863.66	794.76	987.12	904.92	873.58	854.2	907.66
TRIM33	179.075	146.175	186.325	221.7	258.05	221.45	225.225	196.85	252.3	293.925	260.75	253.125	195.15	260.05	200.8	218.25	221.625	164.825	213.175	255.5	212.05	156.2	120.825	165.1	135.3
RFX7	8.5	64.6	36.3	12.8	50.7	71.8	39.6	6.5	24	70.3	62.1	29.5	61.4	39.2	17.1	58.4	63.9	3.8	44.5	51.6	67.3	30.4	14	22.8	22.1
OCLN	10.7	12	10.9	74.5	23.3	13.6	8.6	2.9	26	35.8	55.6	35.9	29.2	23.4	37.9	32.8	22.6	17.7	55	26	8.9	28.1	34.7	47.2	47.4
RAP1GAP	2136.25	382.1	1721.2	2283.7	1645.65	1322.75	1463.9	1497.55	863.5	1872.25	2792.1	1488.75	2195.35	1540.1	1645.5	2475.55	1528.4	1839.1	2218.15	1516	2296.65	2099.7	1588.45	2220.45	1554.75
LZTS1	91.9333	38.9167	155	202.817	136.117	128.883	129.733	156.417	178.5	185.95	173.05	118.1	171.433	159.217	168.617	217	216.867	133.233	154.75	106.6	167.117	183.85	161.283	206.633	125.283
TSEN2	16.1	10.1	9	122.7	51.5	57.8	67.4	68.3	141.2	76.2	122.3	93.8	60.9	111.8	157.9	136.5	89.1	158.5	78.5	84.3	99.3	92.8	119	80	68.6
FRZB	55.85	96.3	73.2	81.9	55.8	80.8	80.15	58	119.65	63.1	136.9	121.5	126.5	97.45	165.3	130.45	94.65	81.95	79.1	84.8	101.5	103.35	91.15	90.45	75.5
OPA3	15.4	35.1	4.7	10.9	50.7	50	41.5	43.1	58.9	30.7	79.9	30.4	20.2	22.5	61.3	53.4	45.6	28.5	39.5	41.5	73.2	68.6	44.7	51.6	25.4
TRIM17	24.5	5.6	34.6	10.2	36.9	84.3	7	73.1	74.9	21.6	89.1	46.3	28.9	59.4	75	82.1	75.4	58.4	39.3	21.5	52.4	60.5	78.2	66	86
RRAS	13.9	12.2	10.8	17.2	10.9	95.6	44.5	36.3	120.7	11.2	122.8	36	103.9	81.2	98	124.7	116.5	22.7	82.2	19.8	52.2	59.1	62.9	118.6	53.9
GPR137	89.5333	67.9667	66.8	142.433	136.433	102.767	85.4	157.1	136.833	59.4667	61.8333	50.2	122.933	97.1	237.967	121.433	116.6	128.067	134.867	89.7667	87.2	137.667	210.1	281.033	59.9
ENC1	458.5	248.1	1251.95	794.6	954.2	1416.95	1106.25	1377.55	562.15	1452.45	1358.65	1552.15	1879.9	2823.9	2919.15	1515.75	1946.55	1621.85	1322.4	1846.6	1953.3	2057.7	2237.9	2807.3	1574.95
PTPRN2	363.2	218.1	591	411.6	427.967	390.467	505.367	482.633	265.367	613.2	583.667	564.3	701.5	923.933	694.233	638.067	787.067	624	416.4	612.933	877.667	717.8	746.4	1199.47	619.467
XPO7	188.2	154.85	253.65	95.2	73.9	134.15	97	147.55	302.05	136.4	192.7	255.25	324.05	301.95	336.75	355.65	341.45	299.4	222.65	223.9	265.85	238.1	264.95	373.75	281.2
CAMK1G	92.85	100.35	129.3	125.65	131.25	93.2	105.4	152.6	156.2	192.35	161.35	153.5	322.9	216.25	179.3	217.2	203.4	307.4	117.3	189	255.15	156	257.05	364.5	178.65
SLAMF7	39.6	21	10.6	17.1	41.1	20.3	8.1	8.5	80.1	28.5	32	29.2	39.2	41.5	20.6	66.8	151.2	13.9	18.5	32.2	14.3	10.5	18	26.5	31.3
MCTP1	261.4	26.3	212.8	101	161.2	188.5	275.1	300.8	575.3	996.2	721.6	336.3	351.6	710.6	1128.2	1331.3	2561.4	250.6	337.8	461.4	318.5	348.9	381.1	645.6	228.9
FOXI1	14.8	13.1	25.5	17.1	50.2	21.6	33.2	16.9	173.7	13.8	22.4	103	78.7	75.4	109.1	112.3	202.2	32	10.1	25.9	85.1	65	41.5	100.1	53.9
DEDD	169.833	132.6	134.333	165.967	123.533	111.5	136.7	101.867	218.4	113.167	115.567	141.333	137.9	157.167	223.567	220.767	209.7	139.333	123.133	114.367	107.7	141.233	153.5	219.867	150.2
PIBF1	81.5	8.9	35.8	4.9	25.8	63.9	51.8	21.8	110.8	113.3	70.3	100.7	154.3	84.9	38.4	65.6	50.7	53.7	69.4	33.7	56	39.9	44.2	50.2	59.1
SOX5	18.5	11.8	61.3	20	18.1	9.2	10.8	33.8	186.6	93.3	117.8	78	91.6	138	55.5	52.2	35.1	9.6	65.9	63.7	10.1	78.5	22.2	93	134.8
APC	202.28	126.18	320.7	184.76	139.84	163.24	204.9	165.56	427.72	349.96	257.48	458.08	311.34	370.28	291.04	313.78	260.54	173.6	241.22	207.82	237.58	228.74	135.36	350.72	235.64
NTRK2	1300.8	985.575	750.275	1506.75	1048.42	884.275	1226.45	955.775	2292.6	1163.12	1117.05	1656.88	1398.95	1501.67	1751.92	2079.28	1404.65	1091.6	1322.03	1195.58	1457.75	1548.85	1217.9	1172.9	1367.35
TIMP3	178.3	198.825	204	250.05	237.725	144.325	221.025	212.775	438.05	271.2	210.45	250.725	339.5	232.15	167.95	373.075	252.1	240.525	213.9	205.9	282.175	337.925	281.9	320.725	295.55
HRH1	95.55	24.2	85.95	66.25	68.2	82.95	52.45	45.7	177.6	65.75	75.35	83.5	105.55	98.15	66.35	127.3	89.25	74.4	69.8	65.45	88	72.1	71.6	103.05	53.75
CACNA2D1	25.1	12.3	11.6	91	25.7	60.6	35.8	62.8	212.9	57.8	82.5	56.4	84.7	54.5	80.6	136.2	70.6	52.3	53.6	57.5	58.7	65.4	50.1	55.9	46.2
FGA	29.2	13.65	30.5	13.8	36.9	38	15.5	31.25	178.45	36.3	93.25	14.5	68.05	68.1	64.4	141.65	92.7	50.4	26.45	30.05	22.35	9.05	55.15	64.85	55.45
SRR	163.35	176	175.7	158.45	223.15	192.65	143.9	201.7	383.3	234.2	236.45	194.9	214.2	246.15	261.85	248.9	205.1	189.25	266.8	253.5	169.65	208	213.1	345.8	196.55
ADH5	290.85	325.3	419.4	341.15	305.5	314.15	302.3	285.55	755.85	420.85	348.9	392.3	402.35	415.05	398.7	416.45	445.75	381.95	299.9	423.7	357.4	390.1	450.95	451.65	348.6
DCTN4	60.8	35.7	94.8	53.4	104	76.1	38.4	26.3	257.1	116.9	143.9	103.5	91.7	68	130.3	144	118.1	138.3	77.4	100.5	118.3	93.6	103.2	151.3	113
PTPN12	51.4	29.6667	97.7333	37.5	49	43.9	19.6	35.6	104.833	92.4	70.5333	55.7667	55.1667	91.2667	83.6	81.6667	67.5667	42.1333	31.6	40.9	61.0667	45.2333	43.6667	70.5667	79.6667
GABRB3	5.6	27.4	192	30.8	57	67.2	49	51.1	155.6	170.2	142.1	144.4	131.9	127.5	197.9	189.6	104.2	77.3	83.1	63.5	128.7	127.7	67.1	156.2	89.6
FAS	82.875	57.3	87.725	72.95	33.775	59.6	35	27.225	135.6	91.75	106.325	64.75	31.85	87.9	133.6	90.225	120.35	62.2	56.25	55.25	82.575	55.4	46.3	54.95	29.675
B4GALT6	63.8	87.35	34.9	30.9	29.1	59.15	28.25	55.6	126.15	138.65	47.3	117	101.4	109.9	140.45	109.95	166.4	49.4	38.85	53.4	77.5	101.3	68.85	82.55	45.8
GATM	161.5	466.1	369	228.05	266.2	284.1	341.9	254.95	745.2	591.6	516.55	474.8	392.3	389.85	686.75	633.2	653.8	357.4	282.85	335.35	333.8	362.55	264.7	410.6	396.35
CD164	150.367	288.533	267.467	167.667	194.333	221.9	203.167	169.133	363.6	363.167	336.9	356.9	269	333.667	304.667	341.9	345.6	235.467	224.833	232.533	256.433	249.3	195.5	188.133	208.733
WDFY3	83.4667	146.1	208.133	190.633	131.167	165.967	135.333	140.367	271.9	275.767	291.4	291.2	254.967	338.867	230.867	344.667	315.033	236.067	179.6	226	265.067	214.8	168.167	242.333	195.367
HIPK1	134.5	172.25	355.15	203.55	240.85	318.25	277.05	321.3	489.15	461.9	444.7	511.7	494.85	578.85	378.55	534.6	531.25	384.4	337.45	327.05	373.9	454.95	410	555.25	420.05
DNAJB9	230	324.6	576.8	278.6	365.3	377.85	350.65	341.3	499.5	718.6	404.45	682.95	637.15	598.35	396.4	526.05	645.45	532.45	409.15	450.35	463.85	433.45	423.15	557	449.9
HMGN4	120.1	256.033	327.467	229.2	305.233	257.767	254.1	302.067	423.167	526.133	327.4	516.5	405.333	474.9	499.067	414.467	510.3	327.267	319.033	286.833	375.867	367.433	396.6	346.067	378.6
FAM65B	196.8	109.8	270.7	174.3	204.15	222.45	169.8	173.1	344.75	417.75	232.9	356.75	315.7	303.65	295.25	327.05	352.6	249	249.45	224.8	299.05	249.15	237.85	230.45	223.75
DZIP1	196	138.45	242.6	213.15	207.1	211.95	241.8	173.05	304	325.65	288.65	313.05	279.1	258.05	267.95	407.35	332.6	216.9	213.45	206.65	273.3	242.4	224.7	193.4	184.45
SMIM8	95.85	46.15	172.55	60.5	76.8	82.2	94	102.4	181.1	160.3	168.7	188.55	303.95	197.4	182.8	331.55	234.35	201.6	146.9	138.4	180.85	208.35	168.3	98.8	196
CAP2	356.2	116.25	1616.05	455.1	443.35	634.15	465.4	502.05	572.85	1940.85	1237.75	1197.5	1330.15	1382.1	1424.15	909.3	1323.6	726.25	626.1	737.25	860.95	809.05	861.4	867.75	852.75
GABRA2	237	104.7	641.3	290	239.6	364.8	519.45	413.5	551.5	1026.05	723.4	1041.15	888.65	877.4	1008.45	818.8	783.45	498.7	607.15	509.7	717.6	710.85	471.2	578.1	546.75
PRKAR2B	149.8	157.1	983.8	444.5	337.8	664.2	456.6	362.3	749.8	1445.8	1314	1478.8	939.5	1188.5	1277.6	999.2	1170.2	843.2	693.1	786.8	1100.2	789.2	622.5	1063.6	526.6
HSF2	26.55	39	64.75	32.25	35.95	59.4	52.65	51.7	52.3	112.75	75.45	95.7	117.1	67.75	142.6	65.85	88.65	80.55	48.2	45.95	73.25	60.35	65.1	85.95	61.85
GBAS	169.5	200.3	533.5	226.9	238.9	359.3	304.8	269	606.5	1340.3	645.7	915.3	846.1	785.5	1033.9	658.7	459.2	372.1	359.1	601.2	844.1	716.8	690.2	1024.4	258.6
NCOA1	326	251.65	502.225	428.55	515.675	498.425	435.975	438.325	469.125	561.35	652.9	623.375	678.4	575.05	665.75	526.9	608.275	459.525	483.1	499.625	612.825	497.325	492.875	369.15	605.075
PDE6D	16.45	25.05	155.45	30.25	58.65	92.3	63.85	88.7	135	167.75	180	144.4	167.55	180.6	178.4	137.6	163.15	95.7	137.35	135.45	162.4	116.1	128.6	157.15	260.05
PRDX3	107.05	207.6	450.25	155.95	152.95	275.75	284.4	203.75	409.5	321.05	299.3	351.6	348.3	423.1	469.95	340.4	536.65	311.25	276.7	338	539.5	368.2	308.35	320.05	301.75
SPRED2	41.9	51.6667	83.9	50.0667	31.8667	40.5	44.7	47.6333	82.1333	73.2	94.2667	62.5333	96.7333	126.733	133.867	87.0667	83.6333	74.9	63.2667	73.8333	74.3333	70.3	72.4333	59.0333	94.3333
UBE2N	186.933	241.667	643.667	234.833	269.6	293.267	300.467	359.733	552.133	501.567	448.967	675.767	697.567	610.733	742.267	565.167	564.4	504.9	391.033	411.333	570.9	465.8	540.233	600.2	482.6
ATP6V1G2	139	175.4	879.3	231.5	272.7	336.8	258.2	347.1	459.1	839.6	803.6	986.2	1139.5	1186.6	1057.7	905.4	1182.6	537.7	354.5	404.6	710.4	649	715	851.8	1059.3
GDE1	11.6	102.4	236	56.5	69.4	143.8	125.9	162.7	174.9	207.9	204.6	216.8	217.9	285.8	599.5	329.2	195.2	405.1	162.1	281.8	342.8	387.9	405.1	460.9	291.7
DRD1	22.6	14.6	329.8	14.4	67.4	92.2	63.5	61.2	61.5	152.1	178.4	336.4	152.2	179.6	539.2	215.2	119.1	231	100.6	105.1	216.9	202.8	200.8	201.2	156
B3GNT2	67	20.5	149.4	37.3	69.5	121.5	71.1	18.5	42.1	193.8	101.8	173.7	148.1	135	369.2	245.2	198.2	170.4	145.1	129	257.6	148.5	138	192.2	105.2
TBL1XR1	23.6	29.2	75.9	30.9	34	58.7	29.2	37.3	78.8	134.5	126.4	144.3	127.5	147	503.1	224.5	80.7	167.8	73.7	100.1	192.6	153.3	118.6	99.6	59
RRAGB	9.3	48.9	94.1	13.2	62.2	118.5	54.3	54.3	76	39.6	57.5	100	38.8	72.3	125.4	80.4	72.9	86.3	59.3	78.1	131.6	108.6	108.4	102.3	118.5
EFCAB1	10.4	7.6	85.4	27.8	92.5	17	18.8	23.5	97.9	108.7	19.8	92.2	96.1	85.8	161.5	144.5	80.8	130.6	153.5	157	185.6	228.4	17.8	91.8	135.1
RASAL2	10.25	14.25	8.75	34.35	16.15	14.9	20	13	38.25	33.85	16.3	41.55	49	61.85	47.35	48.4	45.85	29.65	22.9	6.05	23.2	32.6	26	47.9	44.65
LRP6	78.5	125.5	63.95	92.85	80.75	68.6	96.75	91.8	68.1	94.55	151.35	131.5	197.65	232.2	240.35	266	177.75	123.2	124.25	147.3	159.9	152.4	167.6	202.1	144.45
GIT2	13.35	8.3	20.8	17.75	19.5	11.5	9	9.05	23.85	16.9	50.15	55.25	41.95	65.8	67.25	108.2	69.6	12.1	33	49.05	48.3	42.55	12.5	48.65	109.6
MIPEP	92.85	91.9	81.55	81.05	84.95	116	116.45	90.3	97.3	103.45	131.15	110.45	158.55	124.1	139	113.75	131.25	107.65	95.85	99.25	116.25	121.85	116.4	135.85	140
PCBP2	258.675	244.575	338.425	230.6	197.375	237.575	247.85	326.55	590.75	334.65	290.025	427.625	647.25	548.75	543.225	316.25	473.25	392.325	228	312.275	313.375	396.35	592.55	598.775	736.125
H2BFS	15.2	16.6	21	16.7	7.4	10.7	3.7	8.6	58.3	59.5	71.6	71.5	93.2	80.1	71.3	12.8	80.8	52	13.3	41.9	57.8	41.8	66.3	12.7	216.3
WARS	405.25	280.6	285.05	293.95	494.9	381.4	357	327.5	280.95	284.05	301.8	351	377.15	295.35	291.15	241.85	331.25	541.9	381.85	344.5	356.6	418.85	350.55	323.35	439.35
ADCY9	205.1	143.867	258.667	217.167	234.633	181.333	225.2	292.767	108.967	179.3	251.533	195.067	236.867	207.333	187.7	153.7	226.767	158.5	278.8	242.233	250.133	236.833	205.833	170.6	201.8
AP1G2	152.05	73.95	70.3	200.75	174.1	99.25	112	142.35	18.75	103.55	174.35	81	117.75	66.7	149.4	199.65	77.1	196.7	176.95	160.3	152.15	115.25	194.05	59	100.7
TPM2	53.95	52.35	69.75	82.5	65.25	47.45	71.7	86.8	17.55	22	43.25	62.15	30.4	13.25	42.5	48.05	40.85	48.9	75	55.95	87	52.4	56.8	27.45	38.9
TRO	81.325	144.925	96.375	156.15	139.25	123.375	147.65	94.625	41.775	92.575	140.6	78.325	98	68.575	107.125	93.1	67.725	92.825	135	144.3	151.6	122.35	131.6	65.375	109.75
MTHFR	58.9333	40.9	58.0667	45.4	18.6333	12.3667	36.9	21.3	37.8	12.4667	18.5667	20.1	8.76667	10.7	10.5	17.4333	11.4	15.4333	18.8333	25.5667	14.7333	12	26.3667	19.6333	9.4
IL36RN	127.6	34.3	89.6	111.1	21.5	22.4	25.7	16.7	55.8	5.3	16.3	14	30.8	13.5	15.9	14.6	73.1	15.2	13.4	14.7	38.6	12.8	8.5	15.3	12.1
STK19	444.3	287.65	319.65	320.7	298.2	301.25	338.7	337	415.3	124.55	162.2	133.1	247.7	152.8	184.6	235.7	125.5	253.05	208.1	263.9	207.8	232.8	217.55	224.95	186.35
CCHCR1	276.025	128.3	140.85	167.225	196.15	180.425	163.975	172.075	119.025	81.275	109.85	45.825	82.775	60.975	66.3	75.625	57.45	102.925	111.325	99.725	82.325	92.1	124.4	58.975	106.775
ASIP	127	115.8	110.5	97	53.5	69.7	14.8	38.5	49.9	9.6	40	28.6	5.6	12.2	18.1	20.9	12.5	54.3	17.7	27.5	17.2	11.6	19	6.8	36.4
PAPPA	120.4	69.5	54.2	63.2	56.3	62.7	32.5	52.95	43.2	45.55	34.1	39.4	14.85	17.6	30.8	41.2	23.75	37.95	24.45	26.85	18.05	39.2	26.35	23.65	16.1
APOL2	222	202.15	83.55	161.5	128.7	125.8	68.4	85.55	108.15	64.4	45.3	32.85	77.55	60.3	68.15	89.5	83.2	87	103.2	59.35	92.7	107.3	65.65	81.55	67.75
FRMD4A	305.3	172	132.55	187.05	224.1	82.35	112.15	101.55	184.25	83.95	92.05	79.15	107.1	67.55	53.35	128.75	92.25	87.5	110.3	81.55	115.65	89.15	80.8	56.7	69.7
REXO4	232.6	277.3	178.2	103.5	196	152.7	205.9	88	21.8	61.6	120.3	23.7	27.6	18.8	28.4	28.4	24.8	103	106.3	181.8	102.5	80.7	120.3	18	146
EDF1	2360.55	2387	2793.05	1624.85	2201.75	1681.85	1791.25	1640.85	463.9	1077.8	1100.3	801	901.1	778.45	784.8	418.8	465.25	1032.1	1521.5	1187.75	926.05	1147.6	1427.7	530.5	1844.95
TRMT1	206.6	166.1	208.567	203.8	175.467	154.133	153.033	150.1	44.3667	78.4333	117.167	103.367	76.9333	93.0667	79.8667	107.6	76.5667	138.733	122.9	131.633	167.5	108.633	147.367	101.3	111.433
EHD1	256.38	283.44	234.62	254.28	288.16	207.26	221.12	192.32	115.4	119.94	216.5	142.94	99.16	95.38	110.04	112.62	66.18	141.88	163.4	158.64	138.08	139.82	179.4	157.86	148.92
CERS4	225.6	251.4	247.7	173.2	221.7	89.1	126.7	124.1	18.7	22.4	61.8	13.9	16.8	74.5	60.7	36.3	11.3	46.1	96.3	56.3	27.4	88.3	91.3	73.8	28.8
PIGQ	237	233.1	208.5	188.6	262.5	133.9	150	136.4	38.1	51.4	92.5	74.6	64.5	57.5	40.7	58.1	79.7	79.8	119	87.9	90.5	107.8	114.8	97.7	93.2
TCAP	136.3	125.3	91	174.2	142.5	106.8	90	51.9	27	34.2	110.5	9.8	19.4	11.9	30.9	27	10.6	39.9	101.3	59.6	89.8	16.1	23.6	21.7	9.2
ZNF783	237.15	210.2	132.15	251.1	154.9	143.9	160.7	121.15	81.3	106.7	179.1	103.45	65.45	80	106.25	118.6	80.15	132.7	173.95	140.3	110.3	80.3	113.4	47.7	141.8
CFDP1	424.15	399.4	179.45	457.9	607.95	387.65	301.85	340.95	37.3	183.75	248.85	224.15	224.1	194.2	188.25	232.25	177.75	236	324.4	337.4	301.55	287.1	278.45	124	220.55
ANKZF1	190	241.1	13.5	133.5	149.5	15.6	130.3	176.6	18.1	35	29.5	45.1	10.2	7.7	6.7	9.6	14.3	31.5	166.3	77.5	42.4	23.1	23.8	6.7	10.8
USP34	1636.35	1405.9	617.7	818.8	1160.03	664.575	1193.7	661.475	300.8	603.325	684.8	605.925	505.025	441.3	439.325	429.15	298.7	414.925	1320.9	811.4	663.5	545.2	469.35	272.725	432.175
ZNF771	203.6	86.825	106.25	87.525	128.45	67.375	84.325	77.775	50.55	126.825	72.975	45.925	75.925	47.05	56.6	93.1	48.9	63.45	81.55	60.5	73.75	56.425	63.8	52.4	93.525
BRF1	95.5667	62.8	47.3333	34	68.6667	42.9	50.9667	50.0333	35.8	49.7333	24.8	13.2	51.8667	22.7333	38.9667	26.8	22.1667	20.3	39.2667	45.3333	37.0667	28.1333	49.1667	31.1333	48.5
ZNF444	789.8	622.5	420.7	567.7	723.55	442.75	467.8	463.4	344.05	507.35	332.6	305.8	298.25	289.35	297.95	307.65	326.6	272.1	418.65	272.8	211	222.25	331.65	372.25	259.7
ZNF408	385.8	303.4	110.8	312.5	247.2	58.2	165	172.6	85.9	63	104.8	107.6	61.4	40.9	107.4	49.5	117.5	138.6	114	111.4	137.2	85.6	113.9	145	27.1
EEF1D	2692.12	2260.75	1436.8	1282.5	1950.4	922.575	1193.4	1229.15	966.975	471.55	612.05	593.45	674.7	635.925	339.325	632.075	504.55	842.2	976.475	794	654.7	718.2	884.6	889.25	869.375
TSSC4	409	248.7	246	270.7	320.4	191.2	179.7	183.9	32.2	67.4	89.7	97.4	105.4	62.9	55.8	27	27.9	132.1	96.8	171.1	77.5	63.3	161.8	161.1	40.1
INTS1	400.75	280.25	304.1	285.8	280.15	199.6	229.9	241.75	152.25	82.8	113.95	87.2	114.75	109.35	130	106.55	68.1	122.45	167.3	163.8	136.1	136.5	134.7	166.15	96.25
PPIL2	159.2	151.76	86.82	119.62	120.82	120.5	124.54	76.4	92.2	80.16	94.1	107.64	48.62	33.74	47.44	44.98	34.6	64.26	99.62	103.08	95.3	62.88	55.66	57.04	80.82
LUC7L3	3051.67	2647.07	1137.6	1797.53	1400	1066.7	1504.9	1350.33	660.3	1370.23	902.267	1321.73	818.933	688.367	902.5	889.667	885.367	587.867	1426.73	1240.63	1204.2	932	610.267	449.067	945.1
ZC3H7B	369.4	285.58	208.62	221.34	178.06	163.14	150.34	150.54	161.66	115.96	204.2	125.28	128.98	100.52	88.24	114.2	79.4	93.22	151.42	153.18	122.94	91.52	103.32	91.58	136.66
HAUS2	9863.9	4361.3	1562.5	4316.7	3104.8	2555.8	2497.9	1678.3	1762.8	953.5	1953	1810.2	964.2	774.4	715.6	833.8	755.8	854.1	2360.5	1657.7	1204.4	946.3	1192.4	592	1397.9
PRR11	5350.1	3909.9	1190.6	2717.3	1966.4	1930.3	1863.5	1282.8	1216.4	838	1694.7	1439.6	744.4	729.6	479	689.3	576.4	792.8	2114.7	1265.5	1031.9	808.2	783	549.3	1013.7
FASTK	620.033	418.5	663	395.533	515.6	434.433	466.767	602.3	179.5	237.067	242.7	223.1	257.6	328.7	322.7	327.433	258.933	381.7	355.633	281.733	393.567	345.833	502.233	512.1	263.267
GCAT	387.85	293.95	312.55	269.3	204.45	239.05	307.5	293	233.4	96	152.7	191.35	170.75	197.5	169.25	158.6	123.5	212.5	227.05	191	189.3	197.45	199.8	275.5	210.8
CEP131	154.6	107.4	114.5	112.7	49.8	90.6	119.9	104.5	26.3	47	14.2	38.8	28	59.8	29.7	15.5	23	35.1	78.7	57.1	64.6	38.8	61	53.5	28
CHAF1A	152.8	90.6	110.467	117.367	121.367	62.4333	122.3	107.567	72.2	54.0667	61.8	58.9	86.9	66.4333	61.7	59.5333	77.4333	70.6	71.0333	91.4333	64.4333	74.2	75.2333	97.4667	98.8333
NOC4L	208.4	154.5	131.3	206	217.4	86.7	146.7	195.1	28	77.6	20.6	18.1	23.3	105.9	78.6	19.4	24.7	55.5	150.7	45.9	30	88.7	107.2	100.7	34.3
SIL1	443.6	261.4	480	314.8	545.3	232.8	357.6	273.6	20.3	92.1	108.9	194.6	131.3	142.1	129.2	65.5	60.6	115.7	278	125	79.6	125.5	213.3	231.7	143.4
SMG5	338.7	239.5	196.8	211.95	223.55	224.9	265.55	341.45	89.05	97.7	81.8	123.2	161.65	102.7	125.4	94.9	98.55	196.45	229.85	232	130.1	211.65	196.95	144.65	178.6
PRPF6	474.45	533.9	313.3	370.5	386.9	340.35	373.1	423.55	171.15	98.75	140.35	130.15	194.75	157	207.15	239.75	166.3	339.35	444.05	390.2	237.6	305.95	287.75	263.3	140.45
MTG1	224.5	167.1	145	239.8	119.4	199.6	168.8	162	76.9	51.6	53	31.9	92.4	35.4	126.7	75.5	62.4	165.1	101	122.6	208.3	140.1	95.4	91.3	102
ITGA3	164	91	81.2	169.5	113.4	113.1	139.1	152.2	39.7	53.8	87.2	19.4	86.2	27.9	93.2	30.3	61	86.5	144.2	30.7	113.4	99.8	48.1	83.9	27.7
EIF5A2	62.1	62.4	84.1	39.1	11.1	6.7	50.9	35.3	25.6	18.7	4.3	23.8	53.4	20.5	27.5	22.4	26	26.7	58.4	6.2	35	8.3	39.4	20.2	24.8
QPCTL	118.7	95.4	89.7	27.1	16.5	27.4	39.6	20	48.5	10.4	20	28.1	22.8	24	20	30.6	26.4	54.5	25.7	42.5	86.3	22.7	23.9	22.8	14.3
ZGPAT	76.7	112.8	249.8	82.3	49.5	93.1	99.3	137.9	14.9	13	45.5	22.5	61.2	23.6	62.1	22.1	18.9	71.3	28.5	35.8	110.2	42.1	31.1	16.3	115.6
S100A5	18	82.3	94.2	6	8.3	15.3	10.1	26.5	8.4	3.8	4.4	23.6	14.7	4.1	3.8	4.5	4.2	18.3	24.5	3.8	3.9	2.7	3.8	4.2	5.1
WNT8B	9.3	60.4	44.2	18.9	10.9	9.5	3.5	9.1	14.1	2.5	8.6	3.6	4	7.3	5.5	11.1	6.8	7.8	3.1	4.8	4.9	3.8	4.9	3.1	3.2
FDXR	95.7	202.4	212.4	119.5	100.5	65.3	69.6	52.7	27.9	41.8	16.7	31.2	6.9	35.5	51.7	58.4	16.1	68.2	46	88.5	50.5	59.6	74.6	36.6	6.5
ZNF205	157.2	183.5	254.3	168.6	88.1	87.9	73.9	84.6	18.1	67.1	81.5	16.3	65	33.5	18.3	45.5	40.1	19.9	50.6	92.1	54.2	37.4	55.1	75.1	53.4
LMF1	210.667	150.567	164.367	92.9667	185.867	129.3	112.733	165.6	116.033	91.7333	116.6	87.3333	97.5	73.3	92.6	132.267	105.233	33.4667	111.467	94.6333	127.533	145.2	111.067	198.567	154.667
EXOC3	200.9	662.2	229.1	355.2	450.2	270.5	429	495.8	24.7	91.2	89.1	103.9	110.1	149	48.8	41.8	24.9	161.4	303.4	215.5	90.1	201.5	245.1	303.5	155.1
MAT2A	621.4	876.65	539.05	626.35	879.25	503.75	617.6	729.45	445.65	430.8	536.5	582.5	612.35	445.5	400.15	389.75	322.45	517.15	629.95	586.05	592.6	511.65	586.6	462.7	799.45
NTN3	18.9	35.6	9.1	14.5	5.9	3.7	10.9	4.8	8.1	2.4	15.8	8.3	6.1	4.9	2.8	4.2	5.8	51.9	6.7	15	18.1	4.3	5.4	6.1	4.3
AIF1	55.225	104.725	36.875	35.4	41.35	65.575	99.75	79.3	60.975	37.3	30.85	42.3	53.95	75.7	54.725	50.75	52.7	299.525	78.9	46.8	66.95	87.225	58.175	82.85	68.6
SKAP2	83.3	87.225	58.65	77.25	41.2	45.425	41.625	46.1	44.925	48.45	67.5	40.3	70.75	54.125	14.925	47.75	17.825	102.225	39.3	45.625	56.3	20.925	17.375	42.55	53.075
NCF1	16.4	16.6	32.3	17.8	6.9	12.5	10.5	16.6	11.5	16	27.9	10.1	9.3	17.8	7.6	5.3	7.1	34.5	8	8.3	6	8.6	5.7	3.3	18.4
CPM	102.45	160.8	65.1	64.9	33.85	67.9	56.8	49.3	38.8	33.45	107.95	27.2	47.2	35.6	18.7	54.15	74	56.5	41.35	45.35	32.05	31.65	55.65	22.25	58.15
ALDH1A2	98.9	174.1	73.9	75.1	27.6	56.1	83	68.2	46.9	50.5	113.9	16	31	36.7	19.4	30.7	26.9	69	42	48	40.2	49.4	40	66.9	81.9
ALDOAP2	10.9	74.4	40.5	28.7	4.4	10.5	19.3	7	24.9	2.2	10.1	6.9	7.3	3	6.8	12.9	6.6	35	15	37.9	7.4	5.8	2.6	12.5	29.6
AKR1C4	22.6	55	32.8	26.8	5.6	8.9	7.5	16.6	28.5	5	43.9	8.3	6.4	12.4	6.2	6.7	7.2	44	11.6	47.4	9.3	8.8	5.1	3.6	9.3
FOXE1	38.4	42.85	6.7	49.3	6.05	6.3	10.6	19.25	48.95	3.05	26.35	7.2	7.75	4.25	20.3	8.65	5.8	22.3	5.1	15.9	12.2	6.05	9.55	15.45	7.8
DES	27.95	75.65	33.6	81.5	32.1	10.4	30.2	31.4	48.65	27.35	62.3	30	33.85	11.25	13.3	19.75	30.5	35.65	26.1	40.2	5.05	19.2	22.85	24.05	18.1
KANK3	63.6	100.1	98.7	101.6	26.3	16.3	34.7	41.6	17.5	59.4	95	36.7	17.6	17.7	12	16.5	12.8	46.3	7.2	52.5	38.1	35.7	31.3	48.4	47.4
GYPA	15.075	23.8	23.475	29.875	15.85	15.15	8.2	14.325	16.825	9.9	27.25	7.2	6.725	9.25	9.625	12.05	8.75	10.25	6.675	7.375	5.3	5.825	11.375	5.35	20.075
APAF1	62.1	83.1333	105.467	101.5	42.2	42.2333	47.1333	73.3667	103.633	76.3333	89.7667	45.7	53.4333	42.4333	65.5667	67.9667	60.1333	50.5	45.7333	47.0667	53.7	34.4667	48.9333	38.3	58.1667
SLC16A5	55.3	40.9333	38.1667	20.8	17.9667	44.5667	28.3333	25.0333	24.5	26.7	48.4333	22.1	21.3	26.4333	18.6333	23.2	18.6333	16.9333	31.0333	32.5	16.4333	24.6667	21.7667	14.2667	16.7667
RBM25	487.48	489.28	240.04	385.38	271.18	333.18	283.62	299.94	220.82	391.2	515.46	395.18	327.74	320.44	327.82	416.28	400.04	289.78	300.24	302.64	329.72	358.72	213.9	149.72	189.9
PIAS4	160.6	306.95	134.9	138.4	190	96.85	120.7	160.15	64.85	106	75.6	69.05	67.2	73	36.05	86.05	79.4	73.25	75.45	75.35	71.8	55.8	77.95	62.9	75.95
MYH11	65.85	175.75	20.95	95.925	98.275	53.725	20.75	66.275	26.725	43.125	20.775	43.3	45.9	9.675	16.65	33.225	14.425	9.875	26.35	38.25	23	19.85	29.55	13.625	20.575
DNAJB2	928.4	2401.9	938	831.6	1283.6	792.1	835.3	694.1	157.7	235.8	343.2	302.8	389.1	362.8	366.6	257.9	272.2	752.3	790.1	986.5	600.1	637.9	560.7	313.7	484.1
NEK3	116.75	318.15	136.35	168.3	113	109.85	96.75	96.65	85.9	55.35	99.8	85.4	71.75	94.8	123.3	117.15	72.6	85.9	82.65	114.55	83.2	67.85	79.2	42.95	76.1
CDC42EP2	166.2	257.6	34.7	85.3	161.85	32.3	101.65	89.05	26.7	41.1	53.75	74.45	24	33.25	25.15	21.35	30.8	44.3	91.25	32.95	38	49.35	35.4	46.45	88.1
NDE1	524.7	975.3	256.9	324.4	521.1	333.7	348.9	498	396.2	94.6	304.8	166.5	141	174.2	141.6	123.9	36.6	226.5	258.7	329.2	186.6	201.5	303	178.1	183.5
GPR37	330.2	666.1	130	148.1	238.3	274	211.8	224.6	48.2	39.2	106.6	48.5	27.1	106.3	106.2	25.2	87.2	75.7	66.7	78.1	46	87.2	49.9	149.9	109.9
PIDD1	392.05	502.2	101.8	123.95	246.45	118.55	178.3	98.65	79.35	42.65	108	28.85	55.05	40.95	40.45	67.85	45.4	48.5	104.4	86.95	62	62.85	53.45	34.65	67.15
TFEB	442.1	606.75	173.9	139.6	325.6	175.85	126	168.45	93.1	78.05	153.95	59.3	60.05	138.85	133.05	58.1	86.15	155.8	101.2	177.35	83.5	69.8	107.3	137.3	119.65
KIF1C	132.5	284.3	17.5	52.8	43.5	62.3	73.7	122.5	21.4	29.4	12.9	7.3	60.8	32.1	36	16.2	47.5	41.8	25.2	80.7	10.9	65.1	30.8	29	44.1
PLEKHG3	218.367	587.633	127.533	230.867	264.167	208.333	180.9	153.2	135.7	109.6	145.467	92.6333	76.7667	93.5	105.3	41.8667	37.9333	128.567	87.9333	158.767	108.1	74.5333	133.167	134.067	112.6
DOHH	467.6	1505.05	532.8	386.25	471.35	402.25	360.45	297.35	275.1	352.15	219.55	122.8	153.7	138.35	167.7	151	122.1	225.8	263.85	330.05	168.8	206.8	217.95	187.55	273.4
GJC2	28.3	257.2	19.5	44.1	70.95	23.15	26.3	73.75	32.25	28.05	13.25	21.7	34	21.95	14.45	17.15	17.85	38.6	15.95	25.55	18.6	20.45	18.15	17.8	19.1
CDKN1C	276.675	733.25	172.15	140.95	340.875	171.6	162.525	236.15	112.55	199.8	188.975	80.2	88.275	199.95	149.25	93.75	137.925	151.175	99.45	227.6	138.475	108.675	125.1	174.175	137.775
DNAH17	202.2	667.2	92.3	128.1	266.9	138.3	95.6	133.7	72.7	67.5	31.6	43.3	76.3	80.3	77	20.4	73.6	153.5	82.1	116.7	110.9	65.9	97.5	88.2	124.6
TF	3327.45	13877	1111.83	1885.22	4151.6	2111.68	2044.75	2833.95	454.25	547.75	1319.25	567.975	599.9	1218.47	1202.83	727.425	638.95	1352.22	707.975	2471.68	1158.95	901.2	1050.53	1237.92	1596.75
CAPN3	315.6	1786.23	212.9	231.933	572.9	277.533	250.033	434.967	99.7667	84.7	176.867	111.533	132.033	254.567	343.033	192.733	141.433	201.267	122.933	340.567	155.167	110.8	204.833	318.033	336.967
RAPGEF3	94.65	307.95	13.25	29.95	121.15	32.1	66.5	106	96.5	32.95	38.3	20.45	17.55	24.05	81.6	35.4	23.45	63.05	75.5	57.7	57.15	18.9	22.05	51.7	18
NTSR1	34.5	91.2	19	13.7	6.7	10.3	12.1	14.4	10	8.1	7.6	6.6	11.2	6.7	15.9	8.1	7.9	9.7	15.4	13.9	12.8	8.6	7.5	8.7	15.4
MOBP	2080.35	7702.3	527.55	1061.45	1066.75	1208.85	1122.55	1386.15	721.65	467.5	920.35	497.25	536.15	1368	1030.05	900.65	700.8	1138.65	477.6	1779.95	702.2	543.5	389.75	630.95	1153.05
SORT1	200.3	470.7	118.3	160.75	137.05	110.8	137.8	160.35	160.8	64.4	149.2	95.35	79.1	113.9	182.5	98.75	107.85	153.6	109.15	153.05	83.65	83.95	104.45	143.2	110.3
MCM5	27.45	67.3	12.4	12.4	10.95	10.85	12.9	18.6	18.15	5.3	14	20.1	7	16.3	10.35	7.6	10.5	19.45	7.3	10.5	5.85	9.2	8.45	12.05	9.45
PPFIBP1	185.525	213.975	111.225	153.375	159.65	103.575	139.075	186.825	72.4	114.55	126.1	109.475	94.55	69.5	101.2	117.4	132.25	81.075	122.675	90.05	56.775	55.9	77.275	58.05	107.3
EIF5B	271.35	355.383	132.3	194.85	140.683	175.817	179.233	153.867	134.967	195.4	193.2	145.567	107.867	155.917	184.117	152.517	118.133	188.3	200.95	157.183	171.45	121.033	116.3	90.55	119.183
HMGB1	5551.6	8503.27	4999.23	5929.23	5705.4	5471.97	5464.97	5056.9	2821	4274.13	5380.3	5582.93	3399.77	4076.83	4867.6	3235.1	3928.17	3740.3	5411.07	4806.6	4209.57	4175.57	3434.1	2501.57	4849.5
KHK	169.9	196.3	138.15	78.6	57.9	75.4	107.1	170.5	40.3	66.2	58.2	50.7	61.85	42.9	26.8	22.85	53.25	48.1	71.75	94.65	42.35	67.8	80	51.55	92.1
HBEGF	142.3	186.633	81.4333	102.967	75.8333	82.9667	102.533	160.633	52.2333	122.633	77.3667	47.6333	95.6	96.1333	49.2333	66.7	79.0667	85.5667	104.233	85.1333	66.2	126.233	81.9333	71.4667	52.4
FAM46C	111.9	105.8	40.3	66.6	40.1	36.7	11.2	60.7	18.7	26.6	24.4	40.2	37.1	23.6	17.1	8.7	30.1	34	6.1	20.3	23.4	28.1	20.7	43.3	11.8
PACS1	115.4	97.2	29.6	63.6	51.5	26.3	22.9	76.7	31.8	37.4	43.8	10.4	17.7	25.3	32.7	17.6	20.3	19.9	18.5	12.1	55.8	13.8	10.2	20.3	18.1
ZSCAN16	103.3	113	40.8	51	2.7	11	51.9	58.8	16.1	12.6	22.1	7.6	23	19.9	22.3	43.7	41.1	48.6	22.5	44	36.2	28.8	41.9	6.8	31.1
PTK6	35.6	32.7	18	5.4	8	11.6	2.4	6.2	4.3	2.1	4.1	4.8	6.5	3.4	4.7	7.2	5.4	7.5	3.6	3.1	1.8	2.5	5.7	2.7	9.3
DKKL1	133.8	79.1	31.4	19.8	18.3	9.6	7.2	16.6	29.2	8.5	10.9	10.5	9.8	16.7	17.1	10	16.8	15.2	8.7	10.6	11.6	10	11	15.1	13.9
BMX	113.1	118.3	14.3	45.1	11.2	45	29.1	19.2	55.4	12.2	17.4	10.9	17.6	12.6	17.5	19.6	20.9	14	11.5	7.5	6.4	13.6	15.8	9	14.5
RORB	56.2	88.7	14.9	17.1	9.6	9.4	6.4	8	11.5	4.9	9.8	6.5	7.2	6.8	10.7	17.5	4.1	3.7	7	4.1	3.4	8.5	5.6	3.3	4.2
OBP2A	82	117.1	12.8	14.1	9.4	9.9	8.3	12.1	18.6	7.2	17.5	7.9	6.8	8.9	9.5	13	10.7	9.3	8.7	11.1	7.2	4.5	12.2	13.2	9.5
ARHGEF10	120.65	215.1	70.05	138.6	165.5	120.2	97.8	104.35	90.6	140.5	136.1	63.5	87.6	118.95	93.55	165.25	178.15	149.75	132	141.25	140.6	146.5	77.1	74.7	135
SMR3B	20.6	132.7	28.1	101.6	9.3	10.3	53.7	9.5	17.1	6	13.2	9	56.3	10.1	16.2	11.7	13.1	9.5	65.9	9	7	5	9.5	5.5	8.3
SMARCD2	142.4	307.3	173.9	174.2	123.5	78.1	84.3	124	184.9	84.8	57.9	64.4	45.2	90.5	62.1	70.3	86.6	121.4	109.9	32.7	59.5	63.6	64.3	69.1	64
MYLK3	27.8	64.4	19.7	31.1	2.5	20.5	21.7	7.2	22.7	6.2	3.6	4	2.7	7.4	17.9	17.9	19.6	17.5	15.2	5.1	11.6	22.2	20.6	4	2.5
SLC17A2	16.4	80.9	9.6	45.1	6.1	6.2	4.6	9.8	22.3	4.3	8.6	5.8	8.5	10.8	33.4	6.3	10.1	39.9	3.3	6.7	8.3	6.4	9.1	6.6	6.8
TCIRG1	19.1	114.1	38.6	61.9	95.9	6.1	36.5	62.5	15.2	12	12.3	7.9	23	15.2	37	16.6	44.8	74.4	16	13.9	11.9	15.2	16.9	10.6	22.1
RRBP1	202.42	254.62	57.76	87	120.58	94.26	83.8	85.7	103	39.94	44.3	26.62	63.92	67.22	90.5	78.46	45.28	163.34	62.48	76.3	60.22	75.24	74.22	50.06	47.14
GALNT10	172.2	231.2	98.25	170	152.25	104.9	157.05	104.75	144.8	83.55	99.4	91.6	140.5	90.7	146.75	150.9	93.15	163.8	120.7	149.35	159.15	112.05	138.75	115.65	102.15
TBX1	44.7667	48.2667	62.6333	20.5	36.5667	25.0333	41.4333	34.7667	55.7333	19.7333	25.7667	9.36667	28.5667	24	8.6	45.2	17.1333	18.3333	37.7333	10.6	26.7333	23.0667	13.7333	23.8	26.3667
SOX4	74.92	76.28	112.22	89.44	72.78	47.38	60.34	35.14	106.54	60.54	50.44	59.68	39.52	38.08	64.64	70.22	60.08	48.98	57.76	27.2	46.38	50.22	63.18	47.22	55.66
ARNT	70.4667	56.7333	60.4	52.7	29	27.1333	25.1	21.7	68.9	24.4667	32.3667	20.9667	32.5667	29.8333	31.6333	30.6667	33.0667	24.1	33.1333	14.9	17.5667	25.0333	28.3667	21.3	50.6667
REL	73.8	105.85	98.95	74.1	64.55	89.65	57	47.35	148	114.15	74.15	74.45	41.95	53.2	96.45	97.05	92.15	52.55	34.2	52.4	39.5	37.25	54.15	34.95	114.05
STAM2	49.8	75.2667	55.6333	45.9667	36.9333	52.6333	46.2333	16.4333	67.0667	32.8	37.2333	39.2333	56.9667	51.2667	54.4	62.6	62.3667	38.4	32.4333	33.8	38.3667	24.9667	31.9	30.4	49.8333
ACSM3	12.75	65.9	37.5	40.5	8.75	42.85	51.5	23.05	69.55	9.2	25.5	11.45	27.9	25.2	19	28.5	13.3	39.25	13.15	19	25.05	16	57.55	6.4	45.8
UCP1	26.7	79.9	36.5	15.7	9.2	39.1	41.6	42.5	52.4	8.8	17.8	9.6	14.2	9.5	21.8	36.4	19.9	41.3	23.9	6.8	9.8	14	25	19.6	9.4
ZNF460	58.4	67.35	12.85	44.35	30.5	41.3	81.45	31.6	79	19.7	40.1	14.3	28.8	21.1	29.55	51.05	46.85	53.05	15.6	18.6	20	33	25.35	21.5	35.4
F5	56.95	108.15	32.35	68.2	38.15	41.55	77.95	41.9	92	38.6	56.75	32.15	13.35	36.1	42.65	66.6	45.95	43.05	75.1	51.55	41.45	23.6	31.25	31.2	55.15
WDR62	83.7	175.9	74	68.4	52.1	41.8	72.8	41.7	161.8	25.8	66	20.3	19.9	16.1	18	21.8	44.4	72.8	75.4	70.5	59	48.6	31.1	21.9	36.9
RET	149.6	196.8	65.1667	79.3	99.2667	77.0667	85.8	84.0333	174.067	54.6	91.5	43.5	66.2667	59	75.0333	93.5333	87.3333	85.4333	103.933	73.9	66.3333	80.7333	93.2	52.9667	83.8333
NUP160	50.4	78.5667	46.6667	24.4	38.2	23.1	13.1333	16.0667	33.2333	21.2667	15.7333	49	24.9333	21.7667	19.8667	41	41.2	26.7333	14.2	16.0333	21.2	11.3667	17.0667	25.6	10.8667
FGF18	43	46.62	30.34	32.58	43.66	36.94	40.16	27.4	44.52	23.2	38.82	39.6	24.72	19.68	24.5	27.4	44.22	23.82	25.32	23.66	25.46	20.94	21.86	24.78	18.2
OR2H1	167.9	173.1	86	67.8	80.6	32.9	96.1	83	115.5	36.5	33.9	68.1	45.4	37.8	15	16.7	52.3	65.9	55.3	89.1	28.7	23.2	46.6	58.6	54
PTMA	3205.05	4553.3	2288.6	1810.3	1957.1	1894.25	2054.5	2266.35	2993.25	1550.35	1958.55	1348.15	1658.85	1792.05	1873.8	1449.05	1729.7	1352.8	1919.95	1976.8	1606.1	1430.3	1404.2	2575.5	2323.1
CXCL11	44.3	51.6	3.4	20.7	2.55	22.55	8	8.1	33.8	9.1	18.45	15.9	8	6.9	13.1	26.9	15.75	26.3	6.3	23.25	14.7	8.8	15.5	6.55	11.05
RIN3	108.825	116.975	61.625	57.575	70.4	46.475	62.65	50.925	108.2	92.625	60.625	50.5	38.375	53.9	43.675	76.475	46.65	60.675	51.675	53.275	51.25	36.9	41.575	47.45	46.95
BACE2	213.9	180	94.6	65	73.2	70.6	101.1	59.8	153.3	50.7	133	77.1	28.9	21.5	57.6	55	22.1	88.8	57.2	75.9	25.7	41.4	48.8	10.1	38.6
FUT4	71.45	104.1	29.5	70.6	49.75	15.75	40.4	58.45	65.65	31.6	32.5	39.85	11.4	40.3	34.3	74.45	41.85	36.7	41.6	26.05	39.45	16	35.2	45.5	39.55
HLA-DRB4	9.55	9.65	6.95	11.65	9.5	5.05	5.85	4.95	10.35	2.1	4.35	4.75	4.6	4.75	4.5	9.45	6	3.8	5.75	3.5	3.95	3.7	6.2	3.5	9.95
IGKC	90.94	79.2	42.38	63.54	37.68	43.2	41.68	27.24	87.44	36.88	30.66	30.52	33.22	36.74	35.42	67.04	62.44	36.82	46.62	39.3	24.1	40.42	46.2	55.34	38.86
GPLD1	81.94	62.8	36.34	88.32	39.5	50.3	46.02	47.24	102.54	58.98	23.86	49.06	36.44	43.22	48.36	78.84	69.18	49.76	42.38	53.98	37.92	34.62	45.36	34.56	36.36
MKI67	91.7	124.05	71.65	87.425	51.975	69.725	68.85	56.9	152.95	39.775	55.35	29.825	31.25	40.675	45.2	69.775	86.6	65.725	49.975	52.75	55.325	44.675	41.1	39.25	38.2
TP63	106.367	116.1	58.1667	89.5167	67.4833	64.4667	45.4833	50.4	170.833	40.5667	68.1167	56.0833	43.0667	59.1167	66.9833	99	74.5	63.1167	42.4333	64.35	49.2833	53.1	47.4333	45.8833	59.5167
PML	93.575	92.025	36.8	73.2625	47.5375	50.3875	46.85	41.9875	123.213	33.85	46.925	39.9375	53.425	37.225	42.625	87.5375	79	63.5375	47.85	48.7	38.6125	40.225	47.675	54.375	37.9
BUB1	41.48	46.84	29.54	34.86	13.18	16.8	6.92	21.86	37.14	13.38	21.84	11.68	18.06	11.28	10.02	25.98	18.66	19.04	8.6	20.58	10.72	11.28	21.16	17.08	13.12
IL4	42.85	36.3	22.4	35.7	19.9	19.5	4.45	7.15	44.65	2.15	4.95	1.8	5.05	7.65	6.5	13.95	17.45	24.95	5.7	4.65	3.35	12.2	19.05	11.8	2.45
LTBP1	110.1	145.65	121.1	132.6	92.3	110.2	113.2	130.1	128.15	69.8	97.55	98.55	74.7	58.2	107.05	138.8	143.05	95.9	102	135	109.85	100.3	63	93.95	68.1
TFAP2A	42.3	58.9333	51.1667	66.2667	22.2667	31.8333	26.0667	14.2	22.0667	22.2667	25.7	25.7	20	15.8667	23.2667	60.2333	27	22.0333	21.1667	37.9333	25.4333	24.3667	23.7667	25.6667	21
CXCR6	73.5	100.6	43.1	76.95	11.95	23.5	36.45	20.55	40.55	16.3	63.4	39.75	31.75	39.4	39.5	65.5	45.15	31.8	16.6	21.8	42	32.15	18.25	34.15	17.8
DDX28	79.475	70.1	41.125	55.9	46.175	55.85	85.925	82.9	88	44.375	32.2	36.4	35.975	54.35	47.025	40.275	54.925	43.875	52.825	75.225	73.7	46.525	56.3	67.75	51.4
DLEC1	35.5667	31.7333	22.6667	64.5	17.6667	34.4	76.1333	24.9667	109.5	43.2333	27.0333	47.1333	24.4333	32.2333	71.4667	60.7333	27.5667	45.8	53.2333	75.8	43.7667	76.3333	46.1	62.7333	58.4667
RBL1	24.4	35.5	39.8	42.7	3.1	11	49.7	36.9	74.2	16.5	4.8	33.3	17.8	16.6	15.7	39.2	24.2	26.1	18.7	22.1	11.8	14	18.9	4.8	23.3
PFKFB2	64.8	109.95	56.2	104.1	44.85	69.1	79.7	61.55	186.1	43.6	73.6	73.8	82.35	30.4	104.4	85.7	78.95	69.7	59.9	46.05	77.35	77.35	58.1	75.05	51.35
EXTL1	75	66.5	71.4	116.8	96.3	13.7	102.2	80.7	46.7	38	25.5	22.7	35.4	24.6	49.6	21.5	26.2	60.9	89.3	39.6	40.4	47.9	80	71.7	18.2
TMEM143	160.4	107	81.5	211.9	11.3	15.7	80	54.6	16.7	51.4	12.2	49.6	31.6	35.6	64.6	13.5	11.2	55.4	44.7	19	63.6	9.5	42.8	63.2	10.6
ZNF37BP	68.7	51	22.1	82.4	11.3	5	89.3	39.9	19	5.6	5.2	47.5	49.7	4.9	9.2	19.2	10.6	23.1	45.5	25.4	33.2	24.5	27.8	14.3	3.2
ARC	55	12.5	35.7	188.9	11.9	27.8	75.9	158.3	31.7	9.1	34.2	14.9	53.9	23.2	15.6	17.7	17.2	32.3	13.8	41.3	15.4	9.6	60	19	70.3
ZNF157	7.5	28.8	24.7	63.9	2.7	14.8	3.9	11.4	3.7	1.9	18.9	12.2	2.1	2.6	5.4	7	4.4	17.8	1.9	1.8	4.3	2.6	34.1	2.6	1.8
KRT15	16	10.8	7.9	35.3	9.2	4	5.6	6.6	6.6	4.3	5.5	4.7	2.6	3.9	2.4	6.2	3.4	4.3	5.6	4.3	7.2	3	6.1	4.2	6.3
PSPN	41.6	22.3	55.4	87.9	20	16.8	12.3	10	27.3	12.2	6	15.8	6.6	10.4	9.5	32.4	11.4	30	21	18.7	13.5	13.1	17.2	8.8	21
HLA-DQB1	95.9	56.7	60.0333	52.5667	49.7667	58.3333	66.3	49.8667	88.1333	66.2667	31.6667	48.6333	80	30.1333	38.9333	50	83.7333	64.2667	47.1333	54.2667	38.4	50.3333	61.0667	39.3333	53.8333
NUP188	137.067	70.7	43.8333	86.8333	32.0333	80.9667	70.5333	33.7333	54.7	42.6667	27.0333	53.7333	96.7667	65.5	95.4333	100.333	68.2333	70.9	59.8	25.4667	45.6667	74.7	56.3333	37.9333	84.2667
WT1	64.6	21.45	7.85	26.7	11.45	23.8	11.7	14.6	11	6	8.15	9.95	28.35	11.95	13.2	11.3	39.35	19.45	6.85	6.95	20.6	18.5	34.6	6.5	8.2
PECAM1	1154.63	168.767	129.467	170.2	371.767	172.7	176.667	168.633	166.767	132.1	131.233	105.333	127.467	106.933	118.367	132.2	169.1	198.267	153.667	123.1	118.467	97.9333	132.633	84.9	107.033
CSPG4	263.45	70.55	78.1	100.55	120.05	56.85	43.75	31.9	23	36.1	10.65	27.55	33	32.75	37.35	25.3	39.55	48	62.25	21.2	41.7	57	31.1	31.8	63.1
EFNA1	753.7	266.5	180.3	253.2	370.3	156.9	221.5	183.3	25.2	204	44.4	146.9	157.3	103.8	130.5	111.7	166	209.2	120.3	108.9	128.2	88.7	104.9	82.2	224.4
MED13L	600.825	285.45	223.3	304.975	242.7	247.575	262.875	213.175	262.725	227.475	268.625	329.75	235.175	196.75	142.425	208.825	236	192.7	231.1	228.425	233.475	219.225	196.3	109.15	196
PDPN	161.433	31	55.5333	25.5667	30.5333	26.6667	25.9	22.9333	46.2333	16.5	20.7333	29.4333	9.2	13.7333	19.1333	17.6667	31.8	42.3333	15.4333	13.4	20.7667	13.9667	13.1333	19.2	36.7333
IL17B	54.5	4.4	17.3	17.4	4.1	4.6	5.6	5.5	9	3.2	6.2	5.2	2.6	2.5	4	3.5	3.9	4.2	2.5	4.8	7.5	2.1	9.5	4.9	6
STAT6	289.1	98.85	182.7	189.25	210.4	196.05	196.3	220.85	240.15	150.95	149.5	173.8	152.85	184.4	155.95	277.6	143.65	201.75	165.5	153.75	174.75	144.4	177.9	153.8	226.7
MINK1	1355.38	563.675	439.375	1114.58	1265.35	1036.78	980.3	923.675	1189.55	515.725	803.75	610.1	850.25	962.55	758.65	938.1	1012.77	1091.17	963.25	907.55	939.35	980.1	1147.42	950.575	362.25
LOC101928457	33.95	9.8	12.2	25.75	16.8	11.1	20.9	10.3	30.9	5.6	8	4.8	5.4	19.1	17.3	8.1	6.6	19	19.95	9.55	24.35	8.3	5.65	29.35	5.45
TNFAIP2	327.75	175.15	128.4	272.4	141.85	113.95	136.25	109.95	263.8	128.7	167.7	125	148.6	116.4	184.2	216.95	163.25	160.25	142.45	134.15	180.3	127.15	136.25	139.85	125.2
ANGPT4	51.2	18.3	8.6	33.8	14.1	6.7	9.9	14.4	22.1	3.8	10.7	4.2	3.9	4.1	3.5	8.4	8.2	22.6	16.1	5.6	9	10.4	4.4	12.1	11.7
